# Supplementary material
Source: PubMed Central journal article supplement (PMC3313798)
Supplement: supp_ddr616_ddr616supp_table1.pdf [file supp_ddr616_ddr616supp_table1.pdf]

**Supplemental table 1. Altered genes expression of signaling pathways in the mutant retina**

| <b>Gene symbol</b> | <b>Gene name</b>                               | <b>Forward primer</b> | <b>Reverse primer</b>   | <b>Fold change*</b> |
|--------------------|------------------------------------------------|-----------------------|-------------------------|---------------------|
| Hes1               | hairy and enhancer of split 1 (Drosophila)     | tgccagctgataatggagaa  | ccatgataggctttgatgacttt | -3.697424278        |
| Notch1             | Notch gene homolog 1 (Drosophila)              | ctggaccccatggacatc    | aggatgactgcacacattgc    | -1.61365847         |
| Hes5               | hairy and enhancer of split 5 (Drosophila)     | atgctcagtccaaggagaa   | tagtctgggtgcaggcttt     | 2.123177388         |
| Dll4               | delta-like 4 (Drosophila)                      | aggtgccacttcggttacac  | gggagagcaaatggctgata    | -1.268633385        |
| Gli2               | GLI-Kruppel family member GLI2                 | gcagactgcaccaaggagta  | cgtaggatgttccattgttga   | -1.03361875         |
| Gli3               | GLI-Kruppel family member GLI3                 | agcagaaggagctgagcaac  | gcttgctgagatgtcattg     | 1.105495039         |
| RhoA               | ras homolog gene family, member A              | gaatgacgagcacacgagac  | tcctgttccatatctctgc     | 2.291615393         |
| Ctnnb1             | catenin (cadherin associated protein), beta 1  | aagccggccattgtagaag   | agtcgctgacttgggtctgt    | 1.133072722         |
| Cdc42              | cell division cycle 42 homolog (S. cerevisiae) | acaacaacaaattcccatcg  | ttgcctgcagatcaaaaa      | 1.014230746         |
| Prickle1           | prickle homolog 1 (Drosophila)                 | atggattccttggcgttgc   | tgacggctcttgcttgc       | -1.080430022        |

\* negative fold changes were derived from negative reciprocal function applied to ratios <1.

**P-value**

0.00666236  
0.18029774  
0.14018843  
0.03339738  
0.12095797  
0.19412446  
0.01990519  
0.07563442  
0.44929939  
0.07880842
